# Supplementary material
Source: bioRxiv or medRxiv preprint supplement (https://www.biorxiv.org/highwire/filestream/55518/field_highwire_adjunct_files/0/183525-1.pdf)
Supplement: Supplementary file [file 183525-1.pdf]

# **Brain structure mediates the association between height and cognitive ability**

Eero Vuoksimaa, Matthew S. Panizzon, Carol E. Franz, Christine Fennema-Notestine, Donald J. Hagler Jr., Michael J. Lyons, Anders M. Dale, William S. Kremen

## **Supplementary material**

### **Contents**

**Supplementary Table 1**

**Supplementary Figure 1**

Supplementary Table 1. Mediation model results demonstrating the associations between total surface area (SA, independent variable), height (mediator variable) and general cognitive ability (GCA, dependent variable).

A) Height was significantly associated with GCA.

| GCA    | Coefficient | Standard error | z    | p     | 95% confidence intervals |
|--------|-------------|----------------|------|-------|--------------------------|
| Height | .129        | .046           | 2.80 | 0.005 | .039; .219               |

B) Height was significantly associated with total SA.

| Total SA | Coefficient | Standard error | z    | p      | 95% confidence intervals |
|----------|-------------|----------------|------|--------|--------------------------|
| Height   | .238        | .043           | 5.52 | <0.001 | .153; .322               |

C) Total SA but not height was associated with GCA in a mediation model.

| GCA      | Coefficient | Standard error | z    | p     | 95% confidence intervals |
|----------|-------------|----------------|------|-------|--------------------------|
| Total SA | .202        | .046           | 4.35 | <.001 | .111; .293               |
| Height   | .080        | .047           | 1.72 | 0.085 | -.011; .171              |

A)

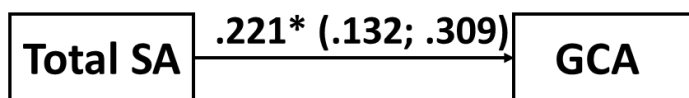

B)

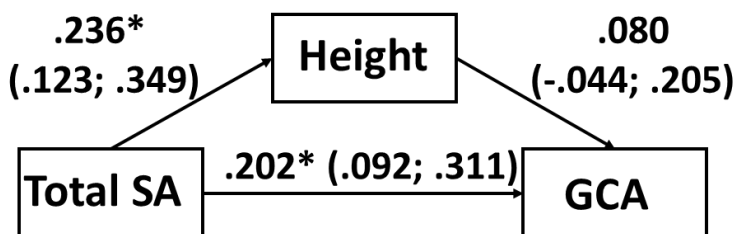

Supplementary Fig.1. Associations between total surface area (SA), height and general cognitive ability (GCA). Path estimates with 95% confidence intervals in parentheses. A) Path estimates for the effect of total SA on GCA. B) Mediation model path estimates of direct and indirect effects from total SA to GCA. \* = statistically significant path estimates. All variables standardized (M = 0, SD = 1).
